# Supplementary material for: Trying to Serve Two Masters is Easy, Compared to Three: Identity Multiplicity Work by Christian Impact Investors
Source: Springer Nature journal article supplement (doi:10.1007/s10551-022-05156-4), 2022-06-03
Supplement: MOESM1 [file 23127180]

Interviews

| **Code** | **Interviewee No.** | **Title/Position** | **Organization/Affiliate** | **Date** |
| --- | --- | --- | --- | --- |
| I1 | 1 | General Counsel, Co-Founder | Impact Foundation | August 2019 |
| I2 | 1 | General Counsel, Co-Founder | Impact Foundation | November 2019 |
| I3 | 1 & 2 | 1: General Counsel, Co-Founder  2: Co-Founder, Managing Director | 1: Impact Foundation  2: Allos Ventures | November 2019 |
| I4 | 1 & 2 | 1: General Counsel, Co-Founder  2: VP of Programs | 1: Impact Foundation  2: Ocean | November 2019 |
| I5 | 1 & 2 | 1: Partner for Theology & Culture  2: Professor of Entrepreneurship | 1: Praxis  2: Miami University | January 2020 |
| I6 | 1 | Managing Director, Co-Founder | Telos Ventures | January 2019 |
| I7 | 1 | Founder | MIGMIR Fund | April 2019 |
| I8 | 1 | Founder | MIGMIR Fund | January 2020 |
| I9 | 1 | Managing Principal and Co-Founder | Sovereign’s Capital, FDI | December 2018 |
| I10 | 1 & 2 | 1: Managing Principal and Co-Founder  2: Executive Director | 1: Sovereign’s Capital, FDI  2: FDE and FDI | September 2019 |
| I11 | 1 | Senior Consultant, Adjunct Professor of Practice | Gordon Conwell Theological Seminary, Babson College | January 2020 |
| I12 | 1 | CIO | Christian Super | October 2019 |
| I13 | 1 | Founder, Managing Director | Refinery Ventures | December 2018 |
| I14 | 1 & 2 | 1: Investment Partner  2: Professor of Entrepreneurship | 1: Access Ventures  2: Miami University | December 2018 |
| I15 | 1, 2, 3, 4, 5, 6, 7, 8 | 1: Founder and CEO  2: Managing Principal and Co-Founder  3: Executive Director  4: CFO, President  5: CEO  6: Managing Principal  7: CEO  8: Writer and Project Coordinator | 1: Hiinga  2: Sovereign’s Capital, FDI  3: FDE and FDI  4: Pinnacle Human Resources, Simmons Capital Group  5: Transformational Business Network International  6: Nexus Impact Advisors  7: Agora Enterprises  8: FDE | October 2019 |
| I16 | 1 | Investment Analyst | His Fund | June 2020 |
| I17 | 1 | Investment Analyst | His Fund | June 2020 |
| I18 | 1 | General Counsel, Co-Founder | Impact Foundation | June 2020 |
| I19 | 1 | VP of Programs | OCEAN | June 2020 |
| I20 | 1 | Managing Director | Glad River Ventures | June 2020 |
| I21 | 1 | Founder | MIGMIR | June 2020 |
| I22 | 1 | Founder | MIGMIR | October 2020 |
| I23 | 1 | General Counsel, Co-Founder | Impact Fund | October 2020 |
| I24 | 1 | Director of Partnerships | Faith Driven Investor | December 2020 |

Conference Presentations

| **Code** | **Speaker**  **No.** | **Title/Position** | **Organization/Affiliation** | **Conference** |
| --- | --- | --- | --- | --- |
| C1 | 1 | General Partner | Elementum | Faith Driven Investor  July 2019 |
| C2 | 1 | Executive Director | FDE, FDI | Faith Driven Investor  July 2019 |
| C3 | 1 & 2 | 1: CAO  2: Director of Hope Global Investment Fund | 1 & 2: Hope International | Faith Driven Investor  July 2019 |
| C4 | 1 & 2 | 1: Managing Principal, Co-Founder  2: Lead Pastor | 1: Sovereign’s Capital, FDI  2: Christ Church San Francisco | Faith Driven Investor  July 2019 |
| C5 | 1 & 2 | 1: Senior Client Lead  2: President, CEO | 1; Caprock Group  2: Inspire | Faith Driven Investor  July 2019 |
| C6 | 1 | CIO | Christian Super | Faith Driven Investor  July 2019 |
| C7 | 1 | CEO | Covenant Group | Faith Driven Investor  July 2019 |
| C8 | 1, 2, & 3 | 1: General Counsel, Co-Founder  2: Founder  3: CFO, President | 1: Impact Foundation  2: MIGMIR Funds  3: Pinnacle Human Resources, Simmons Capital Group | Faith Driven Investor  July 2019 |
| C9 | 1 | President, Pastor | Made to Flourish, Christ Community Church | Faith Driven Investor  July 2019 |
| C10 | 1 | COO (retired) | Angel Investing Network | Faith Driven Investor  July 2019 |
| C11 | 1 | Strategist | Silicon Valley Faith & Work Movement | Faith Driven Investor  July 2019 |
| C12 | 1 | Founder | Ibex International Associates | Faith Driven Investor  July 2019 |
| C13 | 1, 2, & 3 | 1: Director of Kingdom Impact Framework  2: Managing Principal  3: Managing Partner | 1: EIDO Research  2: Nexus Impact Advisors  3: Access Ventures | Faith Driven Investor  July 2019 |
| C14 | 1 & 2 | 1: COO, CFO  2: Managing Partner | 1: Grail Inc.  2: Concentric | Faith Driven Investor  July 2019 |
| C15 | 1 | CEO | Crown Financial Ministries | Faith Driven Investor  July 2019 |
| C16 | 1, 2, 3, 4, & 5 | 1: Professor of Entrepreneurship  2: Interim Director of Program Outreach  3: General Counsel, Co-Founder  4: Managing Principal  5: Managing Director | 1: Miami University  2: Acton Institute  3: Impact Foundation  4: Nexus Impact Advisors  5: The Principles Consulting | Lion’s Den  October 2018 |
| C17 | 1 & 2 | 1: Chairman  2: Partner | 1: BAM Global  2: Heirloom Investment Management | Lion’s Den  October 2018 |
| C18 | 1, 2, 3, & 4 | 1: Managing Director  2: Partner  3: Principal  4: Co-Founder | 1: Founders Advisors  2: Saturn Five  3: Sovereign’s Capital  4: Talanton LLC | Lion’s Den  October 2018 |
| C19 | 1 | CEO | Ocean | Lion’s Den  October 2018 |
| C20 | 1, 2, 3, 4, & 5 | 1: Managing Direcctor  2: CIO, General Counsel, Co-Founder  3: Founder, CSO  4: Managing Director, Co-Founder  5: Founder, CEO | 1: Wherewithal  2: Impact Foundation  3: BraveWave Labs  4: Telos Ventures  5: Leadership Institute for Entrepreneurs | Exploring Deeper Relationships Summit  November 2016 |
| C21 | 1 | Pastor, Founder | Redeemer Presbyterian Church | Redeemer Presbyterian Church  March 2002 |
| C22` | 1, 2 | 1: Author, Senior Research Fellow  2: Author, Chair, Senior VP of Programs and Advocacy | 1: University of Heidelberg  2: Board of Native American Philanthropy, Schott Foundation for Public Education | Faith + Finance: Reimagining God’s Economy  May 2020 |
| C23 | 1 | Founder | MIGMIR Funds | Moody Bible Institute: Faith and Work  April 2018 |
| C24 | 1 | Founder | MIGMIR Funds | Christian Economic Forum, Denver Institute for Faith and Work  June 2019 |
| C25 | 1 | Founder | Eido Research | Christian Economic Forum, 2020 |

Podcasts

| **Code** | **Podcast** | **Episode Title** | **Host No.** | **Guest No.** | **Position/Title** | **Guest Organization/Affiliation** |
| --- | --- | --- | --- | --- | --- | --- |
| P1 | Faith Driven Investor | 11: A Father of the Faith Driven Investing Movement | 1 | 2 | 1: Managing Principle, Co-Founder  2: Founder | 1: Sovereign’s Capital, FDI  2: Blue & Co |
| P2 | Faith Driven Investor | 5: The Investor As a Servant Leader | 1 | 2 | 1: Managing Principle, Co-Founder  2: Partner | 1: Sovereign’s Capital, FDI  2: Andreessen-Horowitz |
| P3 | Faith Driven Investor | 7: Practicing the King’s Economy | 1 | 2 | 1: Managing Principle, Co-Founder  2: President, Founder | 1: Sovereign’s Capital, FDI  2: Chalmers Center for Economic Development |
| P4 | Faith Driven Investor | 8: Rooting for Rivals | 1 & 2 | 3 | 1: Managing Principle, Co-Founder  2: Principal  3: President | 1: Sovereign’s Capital, FDI  2: Sovereign’s Capital  3: Hope International |
| P5 | Faith Driven Investor | 10: Why We Should Invest in Sinners? | 1 | 2 | 1: Managing Principle, Co-Founder  2: CIO | 1: Sovereign’s Capital, FDI  2: Christian Super |
| P6 | Faith Driven Investor | 6: Truth Telling | 1 | 2 | 1: Managing Principle, Co-Founder  2: General Counsel, Co-Founder | 1: Sovereign’s Capital, FDI  2: Impact Foundation |
| P7 | Faith Driven Investor | 3: Creating Abundance | 1 | 2 | 1: Managing Principle, Co-Founder  2: Partner | 1: Sovereign’s Capital, FDI  2: Founders Fund |
| P8 | Faith Driven Investor | 23: Redeeming Capitalism for the Common Good | 1 | 2 | 1: Managing Principle, Co-Founder  2: Director, Author | 1: Sovereign’s Capital, FDI  2: Gordon-Conwell Theological Seminary |
| P9 | Faith Driven Investor | 22: The Four Quadrants of a Faith Driven Portfolio | 1 | 2 | 1: Managing Principle, Co-Founder  2: Founder | 1: Sovereign’s Capital, FDI  2: MIGMIR Funds |
| P10 | Faith Driven Entrepreneur | 51: God Owns It All | 1 | 2 | 1: Managing Principle, Co-Founder  2: CEO, President | 1: Sovereign’s Capital, FDI  2: Barnhart Crane and Rigging |
| P11 | Kingdom Driven Entrepreneur | Mentoring Moment: Don’t Just Fund the Gospel, Re-Present God (Purity in Business, pt. 1) | 1 | N/A | Founder | Kingdom Driven LLC |
| P12 | Kingdom Driven Entrepreneur | Ask KDE: How Do I Carry Out God’s Plan When My Business Partners Are Not Kingdom Driven? | 1 | N/A | Founder | Kingdom Driven LLC |
| P13 | Kingdom Driven Entrepreneur | ASK KDE: Is It OK to Have Financial Goals as a Kingdom Driven Entrepreneur? | 1 | N/A | Founder | Kingdom Driven LLC |
| P14 | Kingdom Driven Entrepreneur | 17: Radical Giving | 1 | N/A | Founder | Kingdom Driven LLC |
| P15 | Kingdom Driven Entrepreneur | 25: Radical Obedience is God’s Plan for Success | 1 | 2 | 1: Founder  2: CEO, Pastor | 1: Kingdom Driven LLC  2: Church for Entrepreneurs |
| P16 | Kingdom Driven Entrepreneur | Mentoring Moment: Stewarding What You Cannot See | 1 | N/A | Founder | Kingdom Driven LLC |
| P17 | Kingdom Driven Entrepreneur | 29: Unleash the Flow of Money | 1 | 2 | 1: Founder  2: Director of Digital marketing | 1: Kingdom Driven LLC  2: MyVirtualHive.com |
| P18 | Kingdom Driven Entrepreneur | Mentoring Moment: You Need a Revelation of Kingdom Math | 1 | N/A | Founder | Kingdom Driven LLC |
| P19 | Kingdom Driven Entrepreneur | 237: Wealth Building for Global Kingdom Impact | 1 | 2 | 1: Founder  2: Founder, President | 1: Kingdom Driven LLC  2: WealthBuilders and Tricord Global |
| P20 | Redemptive Edge | N/A | 1 | 2 | 1: Partner for Theology and Culture  2: Founder, Chairman | 1: Praxis  2: Capital III |
| P21 | “Bottom Line Faith,” Truth at Work | Learning to be Faithful vs. Willful | 1 | 2 | 1: Co-Founder, Host  2: Managing Principle, Co-Founder | 1: Truth at Work, Bottom Line Faith  2: Sovereign’s Capital, FDI |
| P22 | Faith Driven Investor | What Is an Impact Bond? | 1 | 2 | 1: Managing Principal, Co-Founder  2: Director of Special Projects | 1: Sovereign’s Capital, FDI  2: Social Finance |

Blogs / Articles

| **Code** | **Outlet** | **Title** | **Author Position/Title** | **Author Organization/Affiliate** |
| --- | --- | --- | --- | --- |
| B1 | Faith Driven Investor | Gleaning | Associate Professor of Business Ethics | Seattle Pacific University |
| B2 | Faith Driven Investor | What Does Jesus Teach About Investing? | Author, Columnist, Contributor | Forbes Magazine |
| B3 | Faith Driven Investor | Rethinking Risk/Reward to Succeed as a Steward | COO | Impact Foundation |
| B4 | Faith Driven Investor | What Do We Measure? | N/A | Impact Foundation |
| B5 | Faith Driven Investor | Proverbs 1 and the Ethics of Investing | CIO | Eventide |
| B6 | Faith Driven Investor | Where Are the Christian Investors? | CIO | Christian Super |
| B7 | Faith Driven Investor | Why I Invest in Sinners | CIO | Christian Super |
| B8 | Faith Driven Investor | What Is Gleaning? | CIO, General Counsel, Co-Founder | Impact Foundation |
| B9 | Faith Driven Investor | Let’s Move Past ‘Can We?’—How to Measure Your Business’s Kingdom Impact | Director of Kingdom Impact Framework | EIDO Research |
| B10 | Faith Driven Investor | Unifying Principles | N/A | Faith Driven Investor |
| B11 | *The New York Times* | What Would Jesus Do About Inequality? | Assistant Professor of History, Contributor | University of North Carolina (Chapel Hill), New York Times |
| B12 | *Wall Street Journal* | The Intelligent Investor: When God Is Your Portfolio Manager—Christians are increasingly matching their faith with their stock buys | Writer | Wall Street Journal |
| B13 | Faith Driven Investor | Believing in Impact Investing | Writer | Faith Driven Investor |

Working Papers / Personal Correspondence

| **Code** | **Title** | **Type of Document** | **Author Title** | **Author Organization/Affiliation** |
| --- | --- | --- | --- | --- |
| W1 | 2019 Impact Report | Annual Report | N/A | Christian Super |
| W2 | Aligning Return and Values: One Pocket Investing | White Paper | Senior Client Lead | Access Ventures (Caprock Group) |
| W3 | Faith Driven Impact Investment: Setting Goals, Measuring Progress | White Paper | Senior Client Lead | National Christian Foundation (Caprock Group) |
| W4 | Biblical Rationale for Investing | Discussion Paper | CIO | Christian Super |
| W5 | N/A | Personal Correspondence | Senior Consultant and Adjunct Professor of Practice | Gordon Conwell Theological Seminary, Babson College |
| W6 | Kingdom Impact Framework | Working Paper | Director of Kingdom Impact Framework | Eido Research |
| W7 | Can We Measure an Organization’s Spiritual Impact? | White Paper | Director of Kingdom Impact Framework | Eido Research |
| W8 | Some Reflections on Impact Investing for Kingdom Impact | Internal Memo | Senior Consultant and Adjunct Professor of Practice | Gordon Conwell Theological Seminary, Babson College |
| W9 | Exploring Deeper Relationships Summit: Update, Introductions, and Pre-Work | Email Correspondence | CEO | Ocean |
| W10 | Exploring Deeper Relationships Summit: Invitation, Agenda, and Invitees | Email Correspondence | CEO | Ocean |
| W11 | Spiritual Integration and Investing | White Paper | Author 1: CEO  Author 2: CIO, General Counsel, Co-Founder | JJ: Impact Foundation  AM: Impact Foundation |
| W12 | The Redemptive Nonprofit: First Principles | Handbook |  | Praxis |
| W 13 | Measurement Framework | Internal Memo |  | Sovereign’s Capital |
| W14 | Impact Investing Evaluation | Correspondence | Co-Founder | Impact Foundation |
| W15 | What impact are Christian development organizations measuring? What would they like to measure? | White Paper | Director of Kingdom Impact Framework | Eido Research |
